# Supplementary material
Source: PubMed Central journal article supplement (PMC9285365)
Supplement: EDE-22-297-s002.pdf [file EDE-22-297-s002.pdf]

Supplementary File 1

Sanger sequencing corrected axolotl *vwd* ORF

>c1084387\_g3\_i1\_corrected

ATGTGCAACGGGAAGGGGAGAAGGGATAAGACCGAGGCGATGCAGGGCACCGAACCCCTCCACCCG  
GCCGAGGCTCTTACCGCCCCTGTGCACCCTGGTAAAGTCAGCCTTCGCACTCTGGATCCTTGTGAC  
GTCTCTGGGGACAGCAGGCGCTCAGCAAGCTCCAGAGTGTAAGCCAGCGGACATCAGATTCTGCA  
GAATTCATACAGAAGCACTGATTTTCGATTCTTGAGACTTCAGCAGTCAGCCATTCAAGATCTGATCT  
GCGACCACTCCCTGGCACCCGGCTGGTACCGCTTTGTGATCTTTGACAAGCCAGCAGAGATGCCAA  
CCAAGTGCCTGGAGATGAACCACTGTGGAACCCAGGCCCCAGTGTGGCTTTCTCTGCGGGAGTCAG  
AGTCCCTTCTGGACCGGGAGAGATCAGGCAGCTCACGGCCTGTGCAACGTGGCAGTTTTTTTTCA  
GCAGCTCGAAGGATTGCTGCCTCTTCCGTATTCTGTGACTGTGAGGAACTGTGATGGTTTCTATGT  
CTACCTACTGCAGCCAACGCAAGGATGTATGGGATATTGTGCAGAAGTTGTTTCTGATACCACATTG  
CCAACATGTGGCCCTGATGAAGTGGATATTGGTGGTGTGTGCACTGGTAAGCAGTCATCCCCCTGT  
CATTACCACCATCAGCAATGCTCCCACCGCCACCAGGTGTCCCAGAAATTGTGGCAGAGTTGTCCG  
GGTCTAGCATTACCTTAAGTGTTCCTTTGAAACCTCTTCCACAAACAGCTCGGTGGGTTTCGTTGTG  
ACCTGGTCCAGGCTTTCTCTTGATGAGATCAAAGAGGAGCTTCGGCAGGAGACCACGTTCCAGCG  
TTCTCCCTAATAGAGCTGGATGGCATAAACCTCAGGCTCGGAGATCAGATTTATTGCAGCTGTTCTA  
GTTTTTTCTGGAACAACCAGAAGTGCAAAGCCAGAGCATGGAGAGCAGTGAATCTTTGCTGGTGT  
CAAGTTGCTTCTGAAACCTTTAGTATTTCTGAAGATGGACGAGAGCACCTACTGACCGTTGAAAGTA  
CGGTACCGATTCTTGCTCAGAAGTCAGCCAGTTGGACCATGAATGCAAAGTGTGGCTAAAATAAG  
AACAGTCAACGAAGATGAAGAGCAGCCTGACCTTAATGTGGTCTTTCAACTTGTGAGTAGCTCTG  
CGGCAAATGTATTGCCTAACGGTACATGCAGTCATGCTAATCTACTCTTCACTGCAGTGACAGACTT  
TGCCCGAGATGGAGACAGAGCTACACACATTGCTATTGATCCAATCATTAGTGACAACCTTTCTCTGGA  
ATGGATATGCTCCAAAGGGAATACAGATTACAGTGAAGGATTTGCCAACTGCATTTTGTACTCATT  
ACAGACCCTCATATAATTACATTTGATGGCAGGCTTTATGATAATTTTAAAACAGGAACTTTTATGTTA  
TACAAAAGTGCATCTCGAGACTTTGAAGTCCACGTGCGGCAGTGGGACTGTGGGAGTCTCCACTTT  
CGGCATCATGTAAGTCCGGCTTTGTTGCCAAGGAAGGAAGTGCATCATTGCATTTGATATGTGCAG  
TGGTCAGCTACATGAATCACAGCCCCACTTGTCTGTAAGAGCAAGGACACTACCAGTGATAATGTC  
AGAATCACCGAATCCTACTTGGGAAGAAAAGTTACAATTGCCTTCTCCTCTGGAGCTTTTATCCGTT  
TGATGTAAGTGAATGGGAATGAGTCTGACCCTTCGTGCACCAAGCTCAGACTACAAAATACTCTG  
GGACTCTGCGGCACTTTTGATGGAGAGATGGAGAATGATTTTCATGACAGTGATGGGTTTGAATCA  
CACAGACCACCGATAATCAACACACGTTTATAAATGAATGGAGAATTCCTCCAGGGGAGAGCTTTTT  
GACAAAACCTCCACATCTTTGACTTCGCCCAAAGGAAGCATTTTTTCGGATGTGCCGTTGATGACG  
CTGAGCCGTATCAGTCTTCAAACCGGCCGGGGCCTGGATCCCAAGATGACTTTCTGGCCCCGTGTA  
AAGGAAACAGCAATGTCCAGCAGTCTACCCTGATACCGGGACTAGATGTCACTGCAGAATACATCAG  
CTCTGTTGAACACAGCCGGGATTTGTCCAGACGGTCACCGCCCGATGAACTGATTTGGTCAGCTTC  
ATTTCTGGAAATAAACTGCAATTGAAAGAAACAAAACAAGTAAGTCTACAACACAACAGATGGCCAC  
TCCTGCAGTGGATGAAGACGACAGAAAGGGCGAGCATGGAAGCCATTCTCTAAAGGACAGTCAAT  
CAAAAATAGATTAACCGTCAAGATTATTATGAATACCTGCCACATTTCCGTTTCAAAGCCTGAGTCA  
AACTGACCTTGAAGGATTCAACTATTTTTCCAGAGGACCACACGACGGATACGCAGCAGGAGTAT  
ATGCCCTCCTGGCCTACACCGTCTGGTCTTACGCATGCCGGTGCATTGGAGGCATGCCAGCAGACC  
ATCAGCAACTCTAGCATCGCCAAATCTTGTGTGGACCTTCTTGGGGCAGGATCGGGATGTTTTGG  
AGATGTGTGTTACAGATTTGTTGCTGAAGGATGACCTCACCTGGGCAGAGGCAGGCCCTCCCGTTGC  
TGGAGAATGATTGTGAGCGCAGGATTTTGAAGAAGGGAGCTACAATGCTGAAAGATATGGTGTATGC  
ATTGGAAGTATGCTCCAAGCATTAAAGTGTCCAAACTCTGCAGTGGAAATGGACAGTGCTTGGAA  
TGGGGATGTGCCTGCTTTGAAGGATTTAGTTCTTATGATTGCAGTATTCTTTCAGATCAGATCCCAGA  
AATTATAGAAGTGGAGAATGCTGGTTTGTGCGATGTTAGGCAATATGACTGCACATCTGTGAGAGTGT  
ATGGTCAGGGATTACAGGGAGTCAACCAATCTGAAATGTGAAGTTGCAAACATCAGTACTCCGATGG  
TAAGTGGTTTCTGGCTGAGCCTGAGGTTATGCATGCTGCGTTCCGGAACAGCAGGGCCATTGATTG  
CCAAGTCCGCTGATGGGCAACACTCGGATGGTGTGGATCTGGTGGATGATAAACCATTGTTGAT  
GTGGCAAATCAAGGTTTCTAATGATGGTTATGTCTACAGTAACCCTAAAATAATGTCGCTGTTTGTG  
GAGCCTGCCAAACCTGTGACCCACAATCTGAAGGTTTATGTAAGTTTAAAGGAGAAAACCTGCAACAT  
CGAAGGACTCTGCTATGGAGAAGGAGACCCAAACCCAGCAGCCCTGCTTACTTTGCAGACCCGA  
AATATCCAAATTAACGTGGTCCATCTCTGAGAGCAATACAGCCCCTGTGTTTCAAAGTTGCAACACA  
AGCTGCAGACATTTTATGGGGAAAACCTTTGTGATCAGTTTATGGCGTCCGATCCAGAGGGCTCGGC  
CATCTTGTTACAATGGACAAAGGACCTGAAGGCTCCAGTCTATCGCCTGCTGGACTTCTCATTGG

AAAGCCATGTCAAAGGAGCCACAGATGTTTCATTTTTCTATAACTGATGACTGCAACGCTGAAACTAA  
AGTTTCTGTAGAGGTGAGTGTGAAAAGCTGCAATTGCATGAATGGTGCCTTGTGTAACAAATATTA  
ACTTCCCTCCTGGGAGAGGAGAATACCTATGCTCATGTTTGGCGGGATTTGAGGGTGAAGATTGTCA  
AATAAACATTGATGACTGTACATCCAACCCATGTGGCCTAGGCACATGTTTCGATGAAATAACCAACT  
ACAGATGTGAATGCACAGCTGGACTCACAGGTAGAAATTGCCAAGTAGATGTTGATGAGTGCGCGTC  
CAGCCCTGTTTTCTGGAGTCATTTGCTTGAACACATTTGGTTCTATCATTGTGGCCCGTGCCCCA  
GTGGGCTGGAAGGGGATGGAAGGGTCTGCTTCGTGGAAACACGACTACCAACAGATACCCCTTCAC  
ATTCAGTGCTCGCAGAAGACTTAGAATCAGATTATGGTGACGTTGAAGCTGATGCAGAGGATAGTGA  
AACAACTGAATATTATCATTCAATTCCTGAAGAAAATGAAACCACCGATGAACAAACATCTGAGTCTG  
TTTCTGTGCAAAGCAACATTTTGGCAGGTTTAAAAATCCATGTGCTGCTAATCCCTGCTTCCCTGGA  
GTTTCAGTGCTTTGAAGACCTATATTTAGGAGACCATTACACATGTGGAGACTGCCACCAGGCTTTTC  
TGGAGATGGCCATATATGCAGAGCTCATGTGGCATCACCTGAATTTACGCCTCTCCCGATAGACCAT  
CCAGGAACGGGCATTGATAGAAGTGTCACTCCCAGTCCAGAGGCTGCAAGGAATCTGCTGTCACCT  
TCTCCCCCTGAAGCACAACCGCCATCTACCACATCAAAGCCACTTGATGTCCAGGAATCCCTTAACA  
GCCGTTCTTCTGCAACCAGATTATAGGGCGGGGCTCTAGGACACATGAGAATTTGGACCCGTTGG  
GCACATCTTTTGTAGGGGAGACATTGGCTGGTACCAGTGGGATCAAGGATGATTTTTTACCAGAAAA  
AGACAACAACATATGGACTCAATTTAAAAATCTGACAACGCCACAAAGAAAACATCCCATGCTG  
AAACAAAACCTGAGCGAAGTGAGCACTTTAAAAGAAAAGCTACCTGTGAGAAACACTGTTCCAGATTT  
CAGAACCACAGTCAGGCAAAGAATTGGCTTTCACATCCAATTTCTGTAAAGATCACAGATGCTCC  
CGAAGAAGGTGAAACACCAGTGACAGCGGTCTACAAGACAGTGACGTGTGCAGACTTCCCATGCTT  
TCCGGGTGTGCCCTTGTGAACCCAGTCAAGAGAGAGGATTCAAATGTGGCCGCTGTCCATATGGGTA  
CCATGGCAACGGCGCGACTTGCACAGCAATATGTAGGCAGCCATGTGGTAAAAACATGGAGTGTGG  
TGCGCCAAATACATGCCGTTGCAAGCCTGGTTATTCTGGATACAACCTGCCAAACTGCTGTGTGTCGA  
CCTGATTGCAAGAATCGTGGAAAGTGCATTAAGCCTAATATCTGTGAATGTGCCCCAGGATATGGCG  
GTCCTACGTGTGATGATGCATTTTGAATCCACCTGTCAACATGGGGGTGCTTGCCTGGCTCGAAA  
TGTTTGCACCTGTCCCTTGGTTACGTGCGACCCCGATGTGAAACAATGGTTTGAATCGACACTGT  
GAAAATGGTGGCCATTGTGTTGCTCCAGAGGTCTGCAAGTGTAAATCTGGCTGGTATGGACCAACAT  
GCAGCACAGCACTTTGTAGCCAGTCTGTCTCAACGGTGAACGTGTATAAAGTCAAATGTTTGCCT  
TTGTCCGAATGGATTCTTCGGTACTCAATGTCAGAACGCGGTCTGTAACCCTCCTTGAAGAACGGT  
GGCCACTGCATGCGGAACAATGTCTGCTCCTGCCCTGATGGCTATAATGGCAAAGATGCCAAAAAA  
GTGTCTGCGATCCAATGTGCATGAATGGAGGACGGTGCCTAGGGCCCAACCTGTGTTTCATGTCCCT  
CAGGGTGGAAAGGAAAAAGATGCAACACCCCTGTCTGTCTTCAAAAATGTAAGAATGGTGGGGAATG  
CATAGGACCAAACCAATGCCATTGTCTTCCAGACTGGGAGGGAATGCAGTGCCAAACACCTTTGTGC  
AACTTAAAATGTCTATATGGAGGAAAATGTGTGTCGCCGAATGTCTGCTCATGCCGTCTGGATACA  
CTGGAATAGTTGACAGTAAGAAGCTGCAGGTACAAAGTCGTCTATGTTGA

>PS64836\_c0\_g1\_i1

CTTGAAATACAGCTTAATAGAATAACAAAAATAAACAACAAAACGTTTATTCAAAGA  
AATAATGACATATTCACATTATTTTACAAAATTAAGTAACACTAAAGGCACAAAATGCA  
TTCAGTAAGTAACAAATAAGAGTTGAGTGCAGTAAGGCACAATTTTATTATAACCCCGA  
GGAGCCACACAATGAGAATCTTAAAGCTGTTATATTTAGTTATACTTCGGGAAAGACTGT  
AATCAAAGTTTCATTTAAATTTGTGACATTTTTTAAATAATGGATGTCTACATTTTAAACC  
TCATAAACCTACAAGTCAAAATAGGCGTGATATAAACTAAAATAAAACAGTATTTAAATA  
GAAATCGTCTATTTACCATGTACACGATTTACAAGTTAAGAAACACATTTCAAAGAATAA  
CTGAAATTGTCATATTTAGCATTATTATACATATCTAAAAACACAATATACCATTTTTGG  
TTTCTTGTCAACAAAATACTCTACTTTTTCTATTCTGTTTCTGTGCAAGCTTAACTTTT  
GCCCATATAGCGTAAATCAATCGAGATTTGCAATTTTGTAAAATATAACATATTTTGA  
CGTATTATAGGTAGGCTCCCTTTATGTTTTGGGTTTAAATTGATTTCAAAGTAAAGCTAT  
TTTTTATGATTATGGATGTGATTTACTGTAATATATTTATACTACTATACATATCCATT  
CAGAAGATAAAAATTATGTCAATTTGAAATTTTATTAGATCATAAAATAAATTTGGAAGT  
GGTCAGTTACATATAATAATGTACACCAAGGCCATAGTGTTTTAAAAGCAAATGGGCAT  
TATGTTTGTGCTACTTTTACAGTTAAAATTAACAGAATGATTAACCTCGTCCACTCAT  
TTTTCAATAACCCGAGCAAATTTGTTAAATACATATATACATATACATGTGAAGTAGGG  
ATGAATAATTTGAAAAGAAAATGAAAGTCTGAATTTAAAATAGAAATTTTTAATTAACA  
GAATTTTCTATGCATGAAAAGACTATATGTGGATTTTAAATTTGGATGTCATTTGAATATT  
TCCTTCAAATTTGCTTCTTCTGAGTGAAGTCCAGTCTTACAGCAGTGTGTGTTAGTTAAAT  
CTGTATCAGCAATAATTAGCTTTTTGTTACTTCAAATGGTACTGCACCTTTGTACTACAG

AAAGCCCCAGAGAATCCTGGACGACAAAAACATCTGTTAGGATACACACATCTGCCCCCA  
AACAAACATTTATTGTGACATATTGGTGTGGCACTGTAGCCCTTCCCATCCAGCTGGA  
CAGTGACATGTATTGGGTCCCACACATTCTCCACCATTTTTACACTTCTGTAACAAATG  
GGAATGTTGCATCGTTTCCCTTTCCATCCTGAGGAGCAGGAGCAAACATTGGGTCCTACA  
CACTTTCCACCATTGATGCACACTGGATCGCAGACACTCTTTTACACCTCTTTCCACTG  
TATCCATCTAGGCATGAGCACACATTATTCCGCATGCAATGTCCACCATTTTTACAAGGT  
GGGTTACAAACAGCTAAAGGAAGCAGAGTTTTATGTCATTAAGAACATTGTAAGTGCATC  
AAAGTTACATCTATTTAAAAAGCATATACACTCTTACCGATCTGACACTGAGCTCCATA  
AAAACCAGCAGGGCACATGCAGACATTTGGCTTAACACATACTCCACCATTTAAACATAC  
AGGTGTGCAAACAGCTGAGCTGCAGGTTGGTCCATCCCATCCTTCTTACATTTACAGAC  
ATCTGGGCTAACACATTCTCCTCCATTGTCAATGTGCGGTTACACACCATTGTTTCGCA  
TCTGGGACCAACATAACCATAAGGACATGTACAAAGTTTCTTGCTAAGCATGTACCGCC  
ATGGAGACAAGGAGGGTCACAATTTGCTTCCCTCGCAAGTTAGCCCCCATATCCTGGAGC  
ACACTGACATACATTTGGCTTTATGCATTTCCACGATTTTTACAGTCTGGACGACAAAC  
AGCGATGTGACAGTTATATCCAGTATACCCAGGTTTGCACCTGCACGTGTTGGTAAAGA  
ACATTCATATTCTTGCCACATGGATATCTGCAAATTGCTTTACACTTGGCACCATTTC  
AGAATAACCATATGGACAGCGGCCGATTTAAATGACCCATGTTCTGATGGTTCACAAGG  
GACACCAGGGTAACATGGAGAATCAGCACAGGTGAGCAATTTTGGAAATGATGTAGTCTT  
TTCTTGTGATTCATATAAGTCTTGTGGAAGAACAATGGCAGAATGCACCTTAGATCCTTT  
ATATGTTATTCCAGAAGTTCTAGTTTTTGGAAATCTTTTGTCTTCATTCACTTCTTCCCT  
AGAAATGTTTCTTTTATTACCAATGTTAAGCAATGTATTCTACTATTTAAATATGGCAG  
GCTTAGTTTTGGGTTTTGCTTGAGGAGACTCAGGGCGAGAATTCAAAGTCCTATGGAAAGA  
CGTTAAAAGTGGGATTTCCCCAGTGGTCTTTGTTGAGACTGTAACTTTCCAGCTTTTTT  
AGTTGTGGCTGAATGCTTGGATATTGAATCTGTAGTCATCGTAATTGTGGGTGGAGTAGG  
TAAGTTTACTACATTTAGTGTAGCTGTATCAGTTGTTGACTTCTTGATCTTTGTCCTGT  
CAGAGTTAACCTGCTGCATGTAAAACCATTACCATGAAATCCTGGAGGACAGCCACCACA  
AGAAAATCCTGATTCTTGTCTGGATCTTCAAAGCATTGCACACCTGGGAAACACGGCTT  
AGCAGCACAAACCCTTTGAGTGCCAGAGCTAAATTTACGTCTGTTGATTGCTGACGGTG  
AACACTGGTTTTGTTTCTTTGTTTCAGTTATTTTCAATTTTCACTGGGGTACTGATTTGTGT  
TTGTATTTCTGGCCAGATTTATTGTCATTGCCTTCTCCTCCTCAGGATACACCTTCTT  
AACCTCTTCTCTTTGACAAAAGGATTCAGATTCAAAGATTCTTCGACCGCTTTACAGTG  
TCTGCCATCTCCTCTGTATCCTTCTGGACATGAATCACAGATGTAGGATCCAAAAGTGT  
ATTACAGCGAACTCCCACAAAGCAGGGCTTTGATGAACATTCATCAACATCCTCTTGACA  
TTGTTACCTGTAAAGCCTGAGTAACATTCACAAGAATATGCATTGAGGCCGTCCACACA  
CCTGCCGAAGATGCAGGGATTTGATTTGCAGTTGTGAGAGTTGAAGTTACAGTAGTCACC  
TTCAAATCCTCGGGGACAGACACAAACATATTTTCCACTTCCAGGAGGAAAGTTAATATT  
TGTTACACATGTTCTCCATTTAAACACTTACATGGCTCAACAATTACCTCTACAGATGC  
TTTAGCTTCAGCATTGCAGTCATCTGTTACAGAAAATCTGAATGTTTCCGTTGTTTCA  
TGTACCTTCCAGATCAAAGTCCAGCAGGTGAGAGTACTGCCTCCTTTGGACCTTGGTC  
CAGTGTA AAAAGA ACTGCAGAACCTT CAGGGTCTGTGGCCAAGAACTGGTACACAAAAT  
TTCACCTCTGAATGTTTTAAGCTTTGCTTGTGATGTTGGAAAATGGGTGGCTCATTTTT  
TTCACATAATTGACCACGTAAATTTTGAATGTCTGGTTTACACAGCAAACATGGACTTAT  
TGGATTTGGGTACCTTCTCCATAGCAAAGTCCATCAATGTTGCAAGTTCTTTCTTTAA  
TGAGCACAGTCCGTCAGAACTGGCTTACATATTTGACAAGCTCCATCAAACAGTGTTAA  
TGTTTTTGAATTGCTGTATTATAACCATCATTGAGACCTTAATCTGCCATCTGGCAAG  
AGGTTTATCATCAACTATATCAATGTCCATATTATGAGGTGAATGATCATTTTTCCCTGG  
TAACTGACAGTCTAAAACAGTGTTGCTCAAGAAGGAAGCTGTTGTAAGCTGGGGATCACC  
TAACTCCATTCATCAGAAATAAACTGTTCTTTTTATGACTTCACACTTCAAGTCTGGTGA  
ATCTTTAAAACCTTGACCAAAAATCTCACTGACGAGCAGTCATATTGACGAACATCACA  
AAATCCAGCATTTTCTAGCTCAATAATTTCTGGAGGCTGATCAGAACTATACTGCAGTC  
ATAGGCCCCATATCCTGGATAGCACACACATCCCCATTCCGCACATTCTCCATTCCCATT  
ACAAAGGTTTGGACATTTAGTAACGACAAAAGGCTGTTATACTCCTTTGAGTGGCTCTG  
CTCTATAAGCTTTCTTTACATTCATTCTCTAGAAGGGGCAATCCTGCTGTTGACCAGCT  
GATGTCATCTTTTAGTTGAATATCTAGAATGCACATGTCTATAACATCCATTAATCTTTT  
ACCAAGAAGGACTCCACATCCCTTGCTTATGCTTGAATTGGCTACTGTATGTTGGCACAA  
CTCAGCTACTTTTGATTCTGTGAGTCTGAAGGAGTTGGCCAAGAAGGCACAGTGTCAA

GGCAGAATTAGGGGTGTGGTCCTCAGGGAAGAAATAACTGAAGCCTTCGAGGTCTGTCTG  
GCTGAGACTTTGATAGGGAAAGCTTGAAACATATTCATAATAATTCTGCCTTCTTCGTCG  
ATTGTTAGGCTGCCACTTATTCTGCAGATCATCATGTTTATATGCATCAGTGATAGCACT  
TCTGCTGGGTGAACCTCTTTCCATTGTAATGTATTTATGTGGCCTAGCGAACAGATTACT  
GTGTCCTGATGATGTTTCTTCTGAATTGCTTTGATTATTTTTATGAAGTACTCTTGAAAG  
GGGAGAAGAAAAGGAATCTGATCCCGTCCCAATCTCTCGTCGATGTAATTCCTGAAATG  
CTCCGTTGGATTTATGATTCCGGCAGTTATGTCCAAAACCTGGAATTAAGTTGAAAGTCT  
TACATTTGCATTGTTTAAACAGACTGGTGAAGCCCCTGCATGTGCGGGAAAATTAACCTT  
GTTTGATGGAGAATGTGTCTTCAGTGTGTGTCAGTTTTACAGTTACAATAGTGCTTTTTTCAG  
GAATGTACTTTTAAATGATGGTGAATGATCAAATAAACTATTTCCCGCAGCCACCCTCCA  
TTCTCAATAAAAACAGATGAATTTTGAAGTACAGAATGGCCATCTGCACCGCGGAAGTC  
ATTTTCTATATTTTATGATCAAATGTTCCACACAAGCCTTCAGTATGATGATGATCCAAGCT  
AGGAGCTCGGACAGTTAACTCATCCCCACTCATTACATCAGCTCGAACAAAAGCTCC  
TGATGAAAATGTAACCGTGACTTTTCTCCTTGGTATGATTCTGTTATGATGATATTTTT  
ACTACTAGAGTCTTTGTTCTTTATTGCTAAGTGTGGTTTTGTCTCACGTAGTTGACCATT  
ACACATGTCAAACGAAATCATATCTTCATCTTTAGCAACAAAAGCCACAGATGCATGA  
AGCGAAGTAACTGTGGCTTCCACAGTCCCCTGGCGAACATGCACCTCAAACCTCCCGGCC  
CGTACTTTTTATATAATACAAATGTTCCAGTTTTGTAAATTATCATATTTTTCTCCCATCAA  
TGTAAATAATGAGGGTCTGTGAATAAATAGCAGTATGCAAAGGTGCATCTTTAACTGT  
AATCTTGGTGCCTTGTGGAGAGTAGCCATTCCATAAGAAGTTATCACTAACAATGGGTAG  
GACCTCAATTTCTGATATTTTGTGAGAATCCATAATAAAATCAGTAACTCCTGTGAAATA  
TGTAGTCGCAGAGGCACATATTCCTTTATAACATGGAGTATGTTGTAATTCCACTTGACA  
AGAAGAGAGAACAAGATCTGGTCTCAGATTGTCTTCATTTAGTGTGTGCAGTTGTAAAGT  
GATCTTGCAGTCTCTTTAGGTTGTCCAGATGAAGAACAAGGAATCGGTACTGTACTCTC  
AATGTGTAATTTATGTTCTTTACCATCTTCTGATATAGACGCAGTTTCTGGATGAAGCTT  
AATGCCAGCAAAAATTTCTTTGCTTTCAGCTGGAGGTCCTTGAATATCAGGAGAATCCAA  
GAAAAGCTGGATATTTTGCAGTAGATCTTGTCTCCAAGTCGAAGATTTATGCCATCTAG  
CTCAATGAAAGAAAAGCTTTGACTGTTGTCTCTTGTCTTCAAGTCTTCTTTAGTTCCATC  
AGAAGAGAGTCGAGTCCAAGACACAACATGTCCAAGAGAACTATTTGTGACAGGACTATC  
AAAAGAGCATTTTAAAGTAATGGTGCTGCCAGTCAGCTCAGCCACTACTTCTGGTGTGT  
TGGTGAGGGTGGATATTTAGCTTTACAAGTTCACCAACATCTGTTTCAGCCGGGCCACA  
GAGGTCTTGCTTTATGTCTGAAACAACCTGAGCACAGTAGCCATACATCCCTGTGTTGG  
CTGCAGTAGATACACATTAATTCTCCACAGTTTCGCACAGTCACAGGAATTCTAAACAG  
GCAGCAGTCCCTTTGAGTGCTAAAGAAAAACTGCCATGTTGCACAGGCTGTGAGCTGCTT  
CACCTCCCAGGCCGAGGAAGAGACTCTGATTCTTTAAGTGAAGCCACACAGGGGCCCTG  
TGTGCCACAGTGATTCATCTCCACATTTTGTGGCATATCGGCCGGTTTGTCAAAAAT  
ATGGAAACGATACCATCCAGGAGTTAAAGAATGATCACATATTAAGTCCCTGTATTGCTGA  
CTGCTGAAGCTTTTGAAGTCAAATGTAACACTTCTATAAGGGTTTTGGAGAATACGATG  
GCCATTGGGGCTGCATTCAGGAGCTATTTGACAGTGTCCAGCGGTTCATCGCCAGAACGAT  
CATGGTAATCCTGATTGCAACATATTGACCAAATGTTCTAGTGCATGGTGTGATGACAT  
CCGACGTGTCTTTAGTCTCCGGTCCCTCTCACTTAACCCGATTACTCTGTCTGCTCAGAT  
CAGCCAGTATTCAGTGTGTTTTCGTGAGAAGTACAGACAGCAGCGCCGCGTCTCTCACT  
GAGAGCAGTAACTGCTCGAGCGCAGCTGGACGCTCCACTTTGTGCTCTCACACAGCTGG  
CGATGCGGGTCGCTTGAGCTCCCAGTGAGCTGAGCCGGCCGTGTGAGATCGCGTACCGC  
GCCTCAGTAACAGCTAAGGGAGGAAAATCTTCGCAGCCTAATTTGGGCAGTTTAAATGCAT  
CAGTTCTCGACTCACTGGGCGATGCGCACAATAGGCTAGAGCCAAGTTAATTGCATTGTT  
TCGTCTAAAGAGAAAATGCGTATAGAGTAACGTTACAAAATAGCCTTATAAATTGGCTG  
CTTAGCGCCAGCACACCCACACAGAAATACATACGCAGAAGGAATTGCGCGGCCGAATGCC  
ATCGGTTTGTCAAGGGCTGCTGTGATATAAGAACAGGTTTTCTCTGTTTAGGTGAGAGG  
TCCACAGAT

>LG29893\_g1\_i1

TTTTTTTTTAAAATCAAACAAGAACATCTTTATTTAAAACATACAGGATTTACAAATCAGTACAAAATT  
TCATCTTATAATATTTTCATTATTACCATATGATGATTTACATAACAAAAGCATATTGAAATATATTCTT  
TGCTGGCTGTTGTATGTACATAAGAATGTAATGCTAAGTAGAGTATTGCAGTTCCAATACTCATCTAC  
CACTGACCAGTAATGCCACATCAGTAACTTAATTTGCATAGCTATTACTTTTATAATTACAGACATTTTC

ACTAAAATACTGACTAATAAGTACAAATCTAAATTACCATTTGTAGTAAGCTATCAAGTGTGATAAAAT  
TCAAGTCTTTTTACATGTATCACACGTGACAAGATACTGCTCTAGGCACTGTAGTGGACTGTCACCTTT  
ACACTTGGCTTTTTCAAATTTATGTCTTCTTACTAAATTAATTCTTTATAATTCTACATATAGATTACT  
TATGTTTTGAAGTACAATCATTCCAAGTTGCCTTCTTCAATGAACCTAGAATACCACTTACCCTTTGC  
TCAAGATGTTGAAAAAATAGACAACATATGTTGAAATAAATAGTTTTATTTGATTTTATCATTAAATG  
GGAATACATATTTCTGTAATGCATTAGTGAAACCTGAAAATGGAAAACAGCAATAAGATACTGGAAAA  
ATAAAGATGAACATCTGAAGAACACCAAAAGGAGCTACAGTCACAGCTAAAATGTTATCATTGAGAT  
CTCTCTGTAGAACCTACAAAGTCAGAGGTAACAGAGATGCTAGAATACCTGTGGACATGGGAGCTAA  
CTTTTTTTTAAAAAGCTTAGCTGATATAAATAGAGAGTAGCTGATCTAGATAAAAAATAAATGGAAAT  
CTGGGACCTGGACATTATTTATTTGATGTAGGTATGCAGTTGCACTTATATAATATCTACAGCTCCAC  
TCTCATTATTCTGCAACTCACAGGTTTATAAATCATGGAATATGGTTTGGGTAGTGGTCTGGACTCCA  
AATGTATAACTGGACTCCTCTAGATATGCAGTCGTGCATGTGATTTCTTCATTGTGTACTGGCCCCAT  
AAGAATTATGATGGACTAGTGTATGCAGGTCAAACCTGTGCACCAGCACTCTGCAGTTGTGCACAAGG  
TTTATGAATAGCACTCATATACTATAACACATTCACCTAAAAGAAAGTGGCAGTGCAGTCATTAAGAA  
ATAAATGCTACATTTATAAATTAAGTAAAAGTTTTAGGCTTCCCTGGCCAATCATTAAATTAAGGATTA  
TATAACTAGCTAGGATCTCAGTCTACACTTAACCTTAGGGGACACCTCTGTATTATATAGGCATG  
GTCTGTCTGACACATTCACCTAATGTCTACTGCTATATTACATACTGTACTTTTTAAATTTGAAATAAT  
ATTACATGGAAGGTGCATCTGATTTTATTTACTTGAGAACCTCTAGACTGTTAACATTTTTCTCTCTGC  
TCCAGTGATCTCCAAAATATCTGACTTTGATAATGCTGTTGACCAAAAAAGTTAACCACTGTAAACTCT  
GGTGCCCATTTAGCATCAGTGACAATATGCTATGACGATGTTATCAGACTTAGTGCAACTACTTAAGA  
CACACTGCTTATAAACATCACTTGAGTGGATGATTATAGATGCAAAAGTCAGAGCTTATAAATTTGGC  
TAACCAACCCAGAAATGATGTACAAACCTAATACTGTTTCATCGTCATGAGGTAGTAAAACAAAACAAA  
TCCACTTTTTGGGACAATAGCTACTATACGTATAGGACATTTTGTACAGTGCCTGCAAAGCTTTGTAT  
GTACTTTTTTGTGGCATGTATAATCTTGAAGAAGTCACATAATAATTTACAACACATTTAATTTTTTCT  
GAAATACTGATGCAAAGCGTCTTGTATATCAGTTGTAGACCGTTCCCTTTGGAAGACTGAAGATCTG  
TAGTCCATGTTGATTAAGGCAATGTGCTGTTTCATCCCAAATATTTGAACATCTTTTTTACAAGTAGC  
TCCAGTGATACCAGGACGGCATGAACACACATTTGGAAGTATACATCTGCTCCCATACAGACATTTTT  
GTTGACATATAGGTATTTGGCATTGTAGTCCTCCAGCTGTTTTGACAGTGGCAGGTGTTAGGTCCT  
ATACATTCACCTTCATTCTTGCATATCTGAAGACAAATAGGTATGCTACACCTTTTTCTTTCCAGCCA  
GATGGACAAGAGCAAATGTTTGGTCCAACACACTTTCCCTCCATTCATACAGATGGGATCGCAAACAC  
TTTTCTGACACCTCTTTCCAGTGAACCATCAGGGCAAGTGCACACGTTGTTTCTCATGCAGTGGCCA  
CCATTTTTGCATGGTGGACTACATATGGCATTCTGGCACTGTATACCAAAGAATCCATTTGGGCAAG  
GCAAACATTTTTGTTAATGCATGTTCCCTCCATTACAGACACACTGGGCTACATACAGCTGTACTACAAG  
TAGGTCCAGACCAGCCTGCTTTACATTTGCAAACATCTGGAGTAATGCATTCACCTCCATTTTCAAA  
TGCCGATTACAAACCATGGTTTACATCTTGGCCCCACAAAACCATAAGGGCAAGTACAGAGGTTTC  
TTGCCAGACAAGTACCTCCATGTTTCAAGGTGGATCACAGTGAGCTGTATCACATGTTGGTCCATC  
ATATCCAGAAGGACACTTGCAGACATTTGGTTGATACATTTTCCAAGGTTCTTACAATCGGGTGCAG  
ACACAGCAGTTAGGCAGTTATATCCTGAGTACCCAGGTTTGCATCTGCATATATTTGGTGCTGTGCAT  
TCCATATTCTTGGCACATGGGTGCCTGCAAAATGCTTTGCATGTGATTCCATCACCATAGTACCCAAA  
TGGGCACTTCCACACTTGAATGTACCATTTAAAGTTGGCTCACAGGGAACACCAGGGAAGCAAGGC  
GCATCCGCACATGTAATTATCTTTTGGACTGATGTATTATCATCACATCTCCAACCTTACCACCGCTGA  
CTGTTCCACTGTACCAGGAAGCACAGACTGCTCATATGTAATGCTATGTGTGACTGATGCATTTTCAG  
ATCCGTTTCTTGTGTGCTTCCAATCACAAAACCATTTCTGTCAATTTGTAGATGTTGTTTTCAAGTTTT  
TAAATTGCTTTCATCACCTGTTTGCAGCAACACAGTTCCTCTGGTTGGTAAAGGCCTGATCCCCAGAG  
AGGAAGCATTCCATTTCAATTTGTGTTACTGGAAATCTTCTTCTGAATCTCTGTTGTCTTGTGCAGTGG  
AAGTATGAACTGGTGTATCTACCACCAGAGGAATGAATAGTGATAGTACCCTTCTGAGGAACTAATGG  
CTTCTGCTTGTGTAGCAGTAGCAGTGGTTGTAGCAACAGTGGTAGAGGTAGTAGCTGTGGCAGA  
GGAAGTAGTAGTTGCAATAGCAGCAACAGTCATAGTAGTATTTGGTGGAACTACTGGTGGCTGTTTTA  
GTAATACTGGAAGTAGTGGTAGTGACATCAGCAGGAAGGGTACTTTGTTTTGCAGAAGATGCTCTAA  
AAAATGGCAGTTGTGTGGTATATAGTGTGCTGTACACCAGAACCAGATGTAGCTGTAGAGTGGCT  
GATATGCAATTGAGTAATCTGACTTTCATCCAAAATAACATAATCTTCTTTATAACCTTGTGTTTGTATTA  
ATCTCTTCATCCTCATCCTCATAATAAATGTAATCGTCTTTAAAGTTTTTCAGCAACAACAGACAAAGAA  
GGGACTCCATCAGTGGGTTGTTCAATGCATATCTTTCCATCTCCTTGCATTCTGCAGGACAAGAAC  
CACACTGATAGGATCCAAATGTGTTGGTGCAGATCACTCCAGCAAAACAAGGATTTCTTTACACTCG  
TCAATGTCCTCTTGACAATTGTTGCCTCTCAGCCAGTTGTGCACTCACACGAGTAGCTGTTTATTCC  
ATTAATGCACCTTCTGAGCCACAGGGATTAGAAGTGCAGACATCAGTAATTAATTTGACAAAACCTGCC

CTTCAAAGCCAAGGGGACACACACAGAGGTACTCTCCACTTCCAGGTGGCCAGTTAATATTTGTAAC  
ACACGATCCTCCATTTTGGCAGTCACATGGTTTGACAGCAACCTCTACAGTTATTCTGGTCTTAGCAT  
TGCAGTCATCTGTAATAGAGAACAACAAATGACTCTGGGAGTTGTAATGTCACCTTTCCATATAAGCAGT  
CCAGCAGGAGAAAGACTGGCACCTTCAGGTGCAGAGTCCAGAGTGAATACTACCGAGGAACCTTCT  
GGGTCTGTTGCTGTGAACTGGTATACAAAGTTTTCCCATAAAAGTTTTGAAGCTTTTTGTGTGGTGT  
CTGAAGCACTGGTGGATGGTTGTTTTAGTAAGTACCATGTAAATTTGGATAGATCAGGCTGACAC  
ACCAGGCAAGGAGTTGTGGGATTTGTATCTCCTTTCCATAACACAGTCCCTTCTATGTTGCAGGTTTC  
CTCCTTCAGACTACACAGTCCATTAGAATGTGGGTACACAGATCTGACAAGCACCATCATATAAAGTCA  
ATATTTTGGAGTTGCTGTATAAGTAGCCATCATTTGAAACCTTTACTTCCCATCTTGCAATTGGTTTGT  
CATCAATTAGATCCATGCTGTGAGGTGACTGGACATTTCCAGATGGAAGCTGACATTCATGGCTCT  
AGTGCTAAGGAAAGTAGCCACAGTTGTCTGAGGGTTTCCAGGGATCCATTCTCCATTGCTATACTGT  
TGTTGTGTCACCTTACATTTAAGGCTAGGGGAGTCTCTGAATCCTTCTCCAAAACCTCGTACCAAAT  
GCAGTCATAGAGACGGACATCACACAATCCACTGTTTTCTAGTTCTGTAAATTTCTGGCAGCACATCAG  
TCAGAATGCTGCAATCATAAGAGCCAAAGCCTGGGAAACATGCACAGCCCCATTCTGCACACTCTCC  
ATTTCCATTGCACAGATTAGGGCACCTCAGCACTGAAATAATCTCATCAGCCAGTACACCTTGTTCTT  
TTGTATAGAATAGCCATCTTCTAGAACTTTCTTTCCACTCATTTTCTAATAGAGCCAGGCCAGCTT  
CTATCCAGCTGGGATCATCCTTCAGTAACAAGTCTAAGACACACATGTCAATTACATCCAAGATTCTG  
ATGCTAAGTAGGTCTGCACACAGGCTTCTATACTGGAATTAGTAATAGTTTGGTGGCAGACTTCTG  
GGCCTTGTATTCTGTAAGGCCAGAAGGTGTGGGCCAAGTGGGTAAGGCTTCTTGATAGCCCTCTGTA  
GTGTGGTCTTCTGGGAAAAAATAGTTGAACCCCTCAAGATCAACTTGACTTAGACTCTGAAAGGGAA  
ATGTTGGAAGGTATTCATAATAACCCTGACGTTTATGTCTGTATCTTTCAGAGACAGGTTTTCAGTGGA  
ATATCACTTTGCTTTTGAACCACCTTGTCTTGTCTTTCAGTCTTTCATATTTTTCTTTGAGTTTGTTC  
TTTTAGAAAGTGAATTTGAGGTGTAATGACCTTGTGCAACTCCTGTATATTCGGTTTGTATTGCTCATTT  
GGCCACGTGCAAAAGGAGAAACAGAAAAGTCTTTTTGAATTAGTGTATCACGTTTACTTAGCTCTCTG  
GTGAGCTCAAAAGAATTGACATACTCTGCTGTGATATCTAGGACTGGTATTAGTGTGTATGTTGGAC  
ATCTTCTTTGCCTGAACAAATGGATAAATGTCCAGACTTCTGGGAAGTATCAGGCTTGTAGAAGATT  
TTTTGACTGGGCAATATCTTCACTGCAAGTACAGTACGGTCTTCTTCTTGTGAGGTGCTTGATGAT  
GGTACTTTGTCAAACAAACTGCTACCTGGTACAAGTCTCCACTCATCCACAAATGCTTGAGCATTTTC  
CAGGATAGTGATCCCATCAGCACTCTGAAATCATTGTGAGGGTCTTCATCAAAGGAACCACATAGT  
CCCTGAGTATTCCTGTAGTCTGAGCTAGGTGCCCTAAGTGACAAGCTCATTCCCCATTCACTGACAT  
CTGCACGGATAAATGCTCCTGAAGAAAATGATACTGTTACTTTTTCTTCTTGGTAGGATTCTGTGATT  
CGTACATTACCTCCTGTGATGTCACGACTTTTTCACTGATAAATGCGGTCTAGTCTCATGTAGTTGGCC  
ATTGCACATGTCAAAGAAATTATGTCACCTCTTTCTCTGGCAACAAAACCACAAGTACAAGCAGCTT  
GGTAATGGAGGCTGCCACAGTCCCCTGGCGAACATGAACCTCAAATCGCGATTTGACTCTTGTA  
TAAAACAAATGTTCCAGTTTTAAAATTATCAAACCTCCTGCCATCAAATGTAATAATATGTGGGTCTGT  
GAATGAGTAGCAGTATGCAGTAGGAACATCCTTTACTGTAATCTGTATACCCTCTGGGGCATAGCCA  
TTCCAAAGAAAATTCTCATGAAGTATAGGATGAGCCACAATTTCTGTCACCTTGTCTCCATCATGTGAA  
AAATCTGTACAGCTGTGAAGTAAACAGTTCCACTTCCACAGATCTTATTATGGCAAGGTAACCTGGTG  
CAAGTCCACTTGACAAGATGAAAGGGCAAGGTCTGCAAATGGATTCTGTTTCATCTTCTTTATTCACTG  
TCTTTAGCTGGAGAGAAAATCTTGCAGTTATGGTCTTCTGCTGGCTAGTGTGAGCAGCAGGGATGGGTAC  
TGAGCTCTCAATTGTGAGCCTATGTTCCATTCCACTTCTGTATATTGTATGAACCTCAGGGTATACCTT  
TACACCAGCAAAAACCTCCTTGTCTTCAATGGAAGGGCTGCGCACATCAGGGGTCTCCAAGAAGAAA  
CTGGAAGTGGAGCAATAAATCTTGTCTCCAAGCCTGAGATTTATGCCATCCAGTTCTATAAATGAGAA  
TGTTTGGACTGTCGTTTCTGCGCAGTTCTTCTTACTCCATAAGGGGATAATCTGGACCAAGTAA  
CAACAAACCCAAGAGAGCTGTTTGTGCTGATACATCAAATTCACACTTTACGTAATAACACCCCCCT  
GTCAACTCTGCCACAACCTTCTGGAGTAGACGGTGTGGTGGATATTTAGCTCTGCAGGCTCCTCCAG  
CTTCTGTTTCTTCCAGGGCCACAAGACTGCAATTTTAAAGCCAGAACTACTTCAGCACAGTATCCCATA  
CATCCCTGTGTTGGTTGGAGCAAATACACAAAGAAATCTCCACAGTTTTCGATACTAATTGGTATTCCG  
GAAAAGACAGCAGTCTTAGTAGCACTGAAAAAAACTGCCATGTTGCACAGGCTGTTAGCTGCTTG  
ATTTCTCCGGGCTGTGGAAGAGATTAGAGTCTTCAAGTACAGCCATATAGGGGCTTGTGTTCCAC  
AGTGATTCATCTCAACACATTTGGTTGGCATCTCTGCTGGTTTATCAAAGATCTGGAAGCGGTACCAT  
CCTGCAGTTAATGAGTGGTACATATCAAATCCTGAATAGCTGATTGTTGGAGTCTTAAGGAATCAA  
ATCAATGCTTCTATATGGATTTTGAAGTATTTGATGTCCCCAGGAGAACATTCATGTGCTTGTGCTGAC  
AGACAGCTATTTTTAAGTGCATTAAGTACTGAGATCCAGATAATAAAACAATCTGCAAGGAACTTTTGAGTC  
ATGGCTAACAAAATGTATTATTTCAATCCAGATGCTTGATACTTCTGTTTTGCCTCTTACAGCTTA

ACTTAAACAAAAATGTTCCCAGTACCAATTGACCTGTCACATTACTATGCACAGTTATCAATGGCCA  
GTGGACTCAAGTGACTGCACTACTAGACACTCTGTAATCCTACACATGATGCTG
